# Supplementary material for: DNA methylation changes involved in the tumor increase in F2 males born to gestationally arsenite‐exposed F1 male mice
Source: PubMed Central journal article supplement — Cancer Sci. 2019 Jul 25;110(8):2629–42. doi: 10.1111/cas.14104 (PMC6676110; doi:10.1111/cas.14104), 2019-07-25
Supplement: CAS-110-2629-s001.pdf [file CAS-110-2629-s001.pdf]

A)

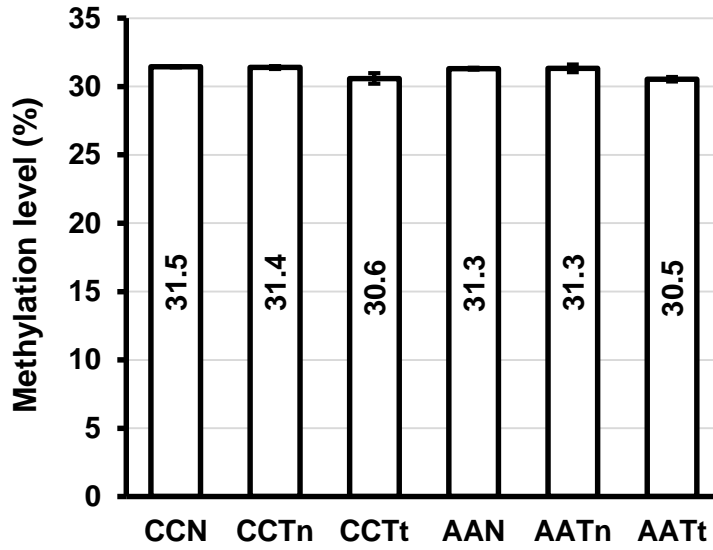

B)

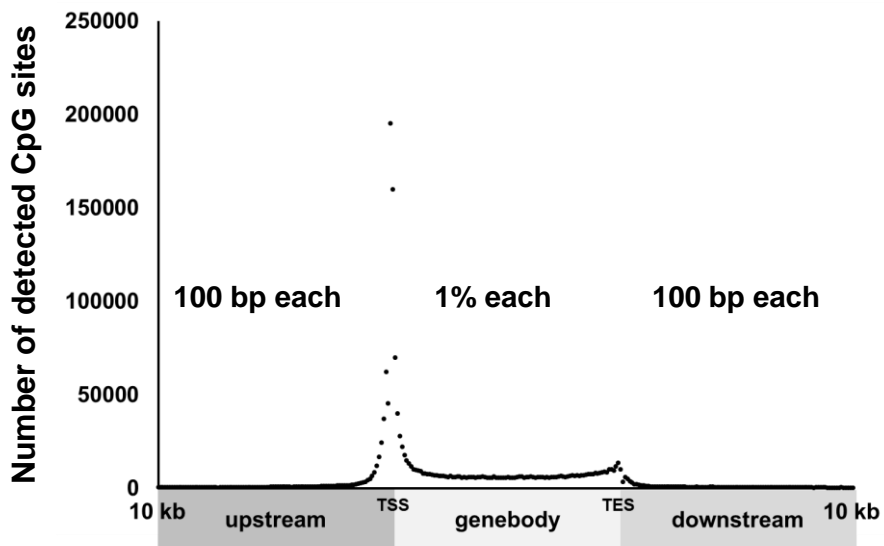

Figure S1

The feature of global changes of DNA methylation levels in F2 livers detected by RRBS analysis

A) The total DNA methylation levels of each groups.

B) The relationship between TSS distance and the number of CpGs.
