# Supplementary material for: DNA methylation changes involved in the tumor increase in F2 males born to gestationally arsenite‐exposed F1 male mice
Source: PubMed Central journal article supplement — Cancer Sci. 2019 Jul 25;110(8):2629–42. doi: 10.1111/cas.14104 (PMC6676110; doi:10.1111/cas.14104), 2019-07-25
Supplement: CAS-110-2629-s002.pdf [file CAS-110-2629-s002.pdf]

# A) AAN vs AATt

(1)

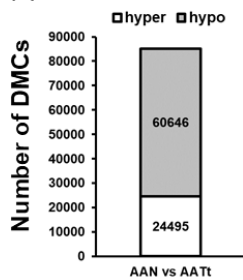

(2)

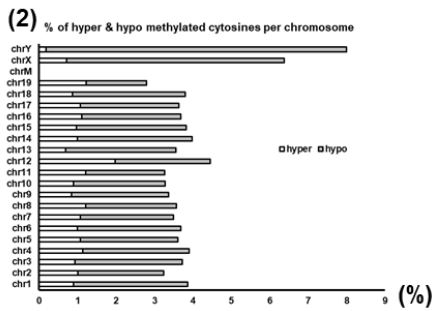

(3)

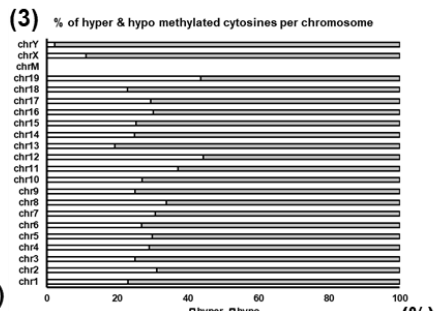

(4)

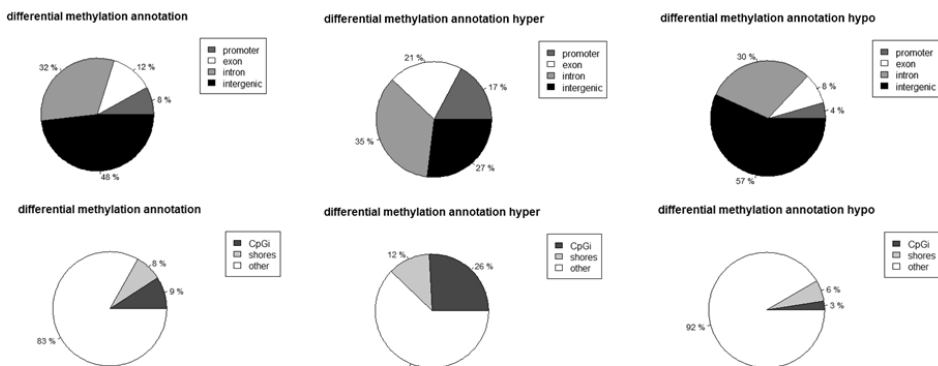

# B) CCN vs AAN

(1)

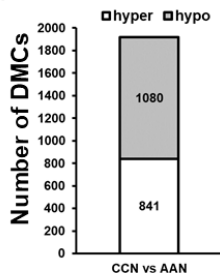

(2)

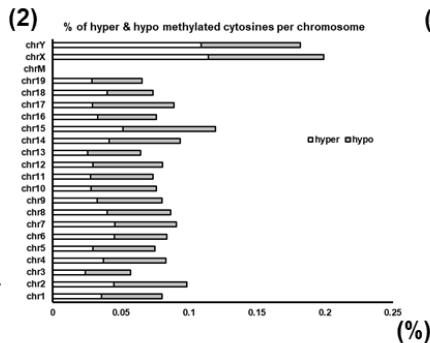

(3)

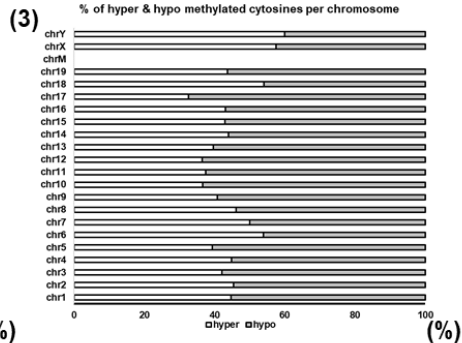

(4)

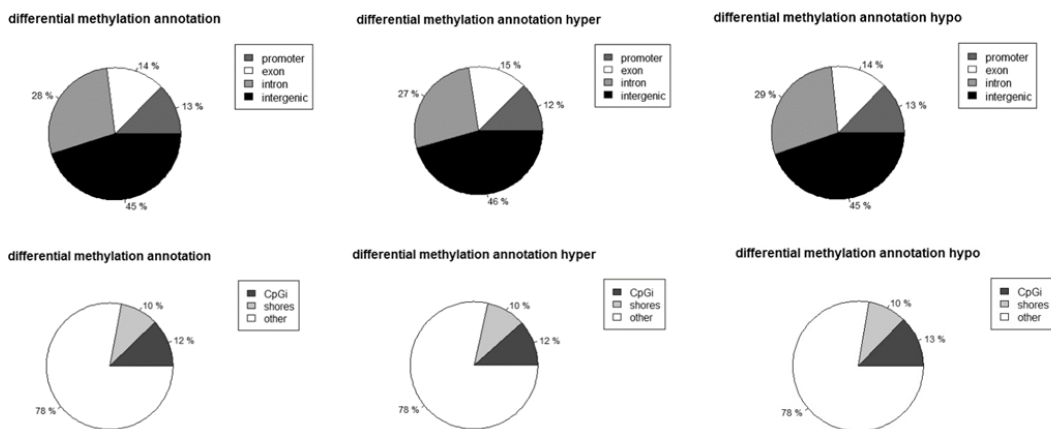

### C) CCTn vs AATn

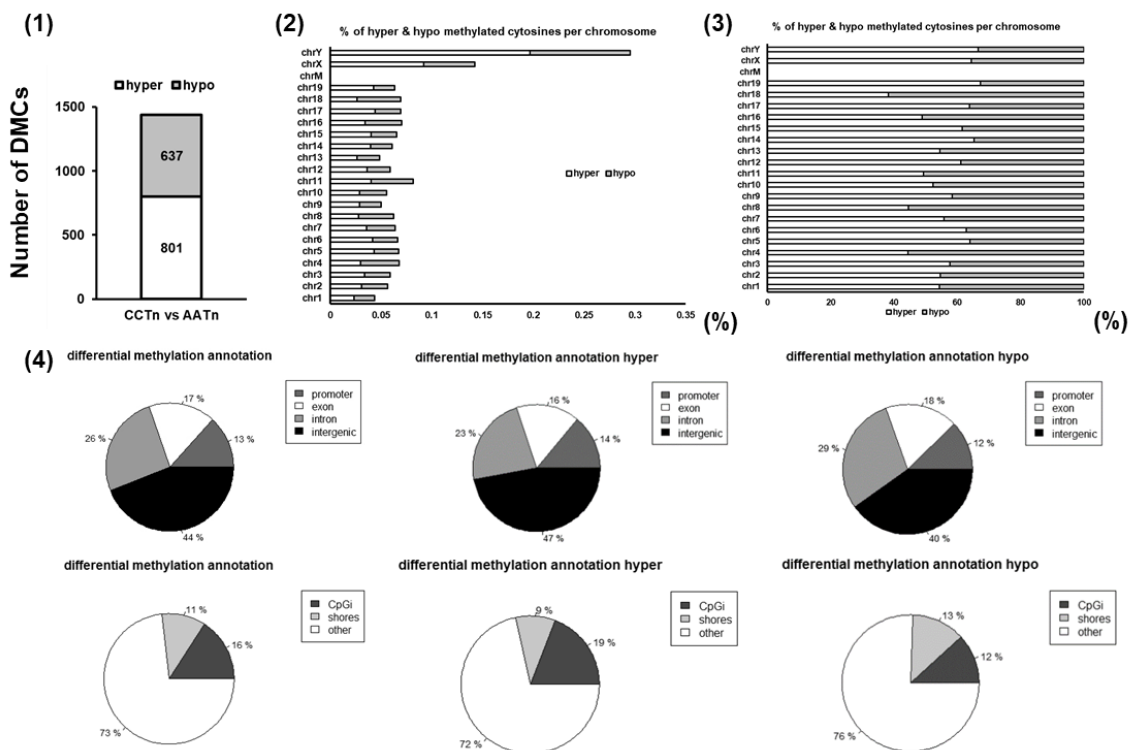

### D) CCTt vs AATt

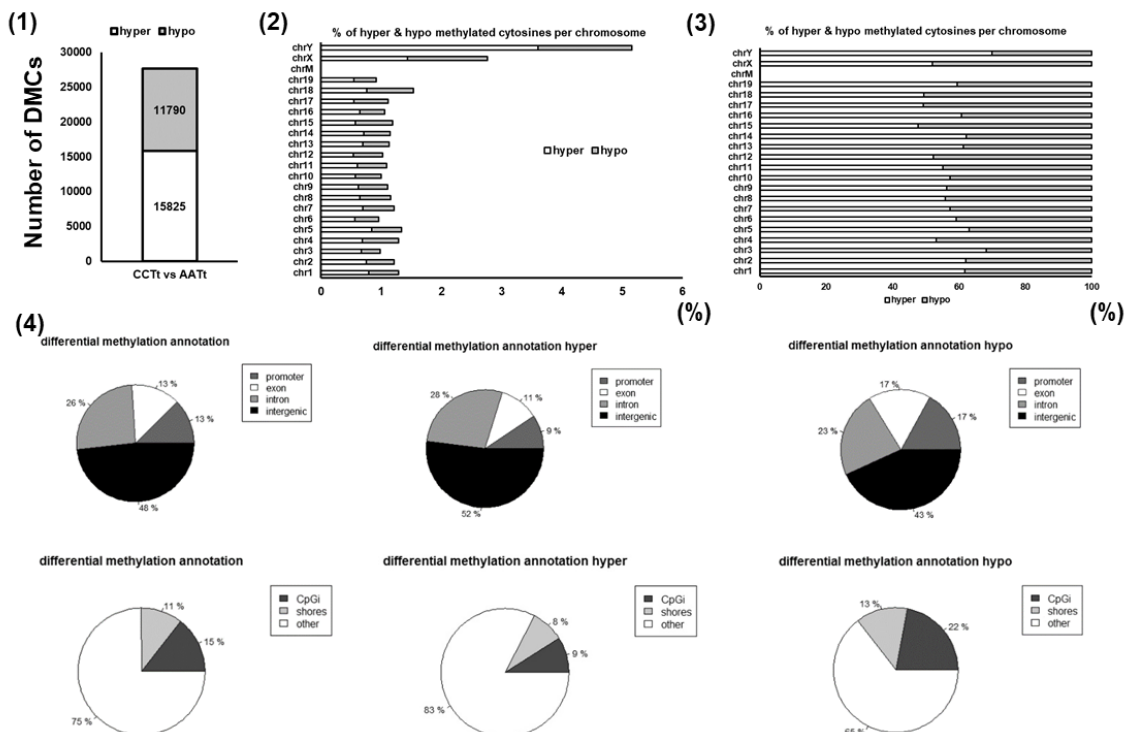

Figure S2

The features of DMCs obtained by analysis of RRBS data using methylKit package. In A) AATt compared to AAN, B) AAN compared to CCN, C) AATn compared to CCTn, and D) AATt compared to CCTt, (1) number of DMCs (white; hypermethylated, gray; hypomethylated), (2) % of hyper and hypo DMCs in detected CpGs per chromosome, (3) % of hyper and hypo DMCs in DMCs per chromosome, (4) annotation data of DMCs, are shown respectively. The analysis was done under the default condition of methylKit.
