# Supplementary material for: DNA methylation changes involved in the tumor increase in F2 males born to gestationally arsenite‐exposed F1 male mice
Source: PubMed Central journal article supplement — Cancer Sci. 2019 Jul 25;110(8):2629–42. doi: 10.1111/cas.14104 (PMC6676110; doi:10.1111/cas.14104), 2019-07-25
Supplement: CAS-110-2629-s003.pdf [file CAS-110-2629-s003.pdf]

**(A)**

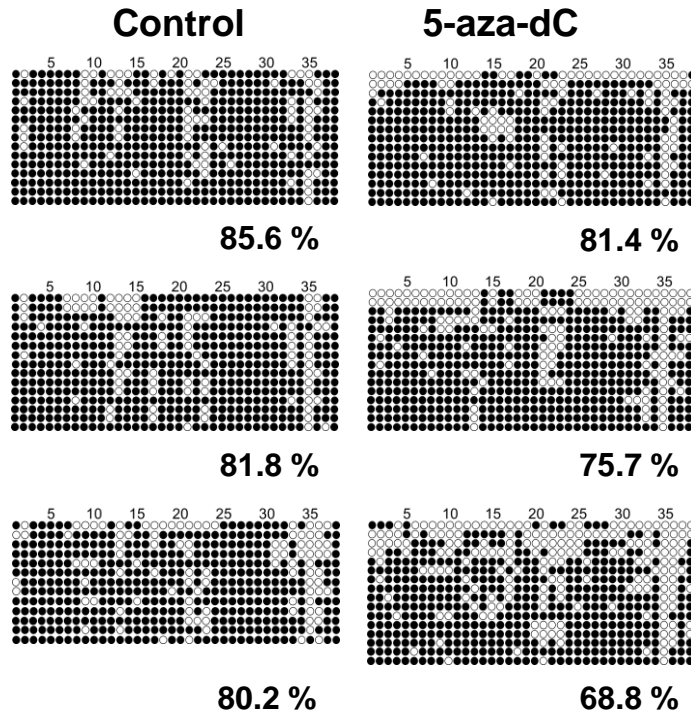

**(B)**

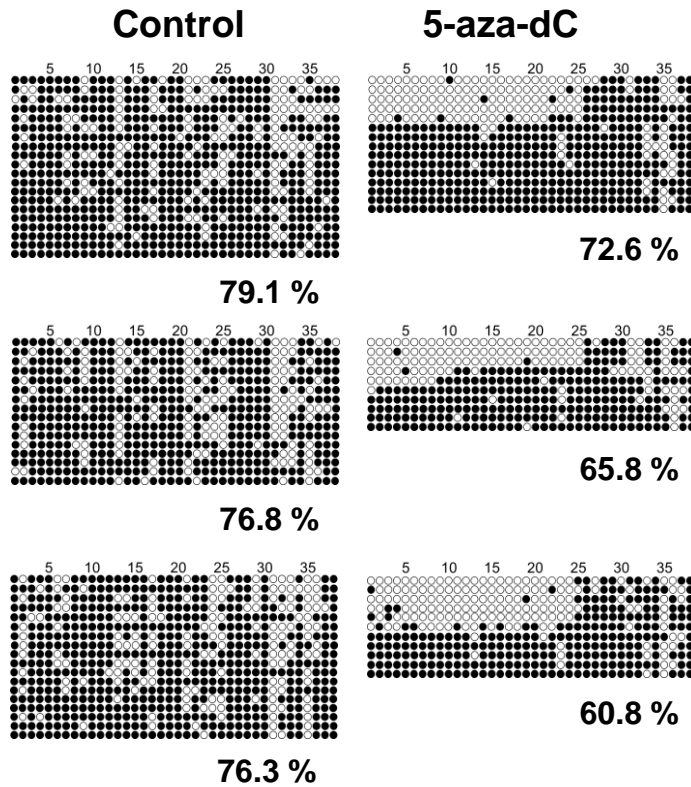

Figure S3

Bisulfite sequencing analysis of DMR of Tmem54 in Hepa1c1c7 cells (A) and GRX cells (B) treated with or without (Control) 5-aza-dC.

○, Unmethylated cytosine; ●, methylated cytosine.
