# Supplementary figures and images for: DNA methylation changes involved in the tumor increase in F2 males born to gestationally arsenite‐exposed F1 male mice
Source: PubMed Central journal article supplement — Cancer Sci. 2019 Jul 25;110(8):2629–42. doi: 10.1111/cas.14104 (PMC6676110; doi:10.1111/cas.14104), 2019-07-25

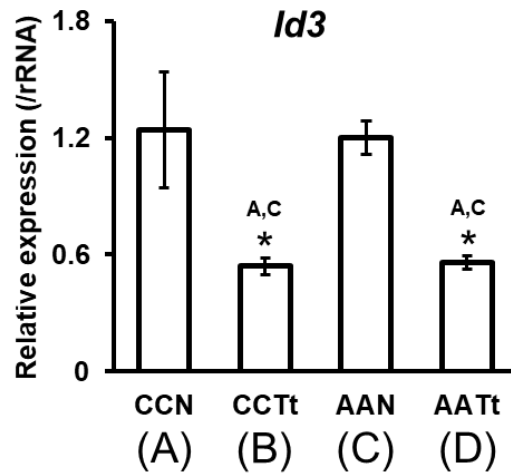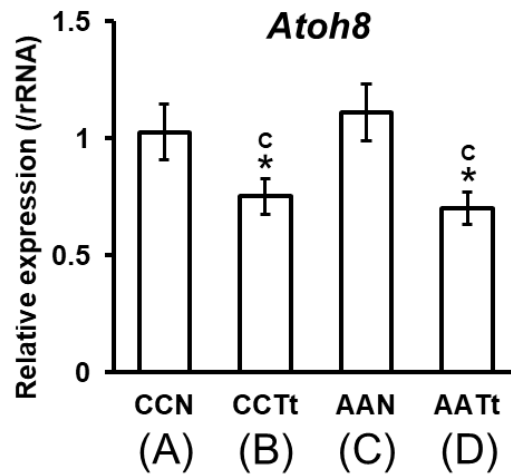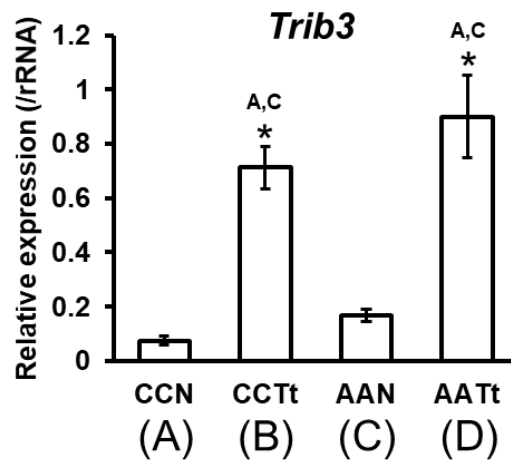

Figure S4  
 Real-time PCR measurement of *Id3*, *Atoh8* and *Trib3* in CCN, CCTt, AAN and AATt in F2 mice.

Supplement: CAS-110-2629-s004.pdf [file CAS-110-2629-s004.pdf]
